# Supplementary material for: Adjuvant BRAF-MEK Inhibitors versus Anti PD-1 Therapy in Stage III Melanoma: A Propensity-Matched Outcome Analysis
Source: MDPI journal article supplement (doi:10.3390/cancers15020409), 2023-01-07
Supplement: s1 [file s1]

## Supplement

Table S1. Other patient and tumor characteristics in cutaneous melanoma patients treated with adjuvant BRAF/MEK-inhibition therapy and adjuvant anti-PD-1-treated patients.

|                                                   | Original sample             |                   |         | Nearest neighbor caliper matching |                   |         |
|---------------------------------------------------|-----------------------------|-------------------|---------|-----------------------------------|-------------------|---------|
|                                                   | BRAF/MEK-inhibition therapy | Anti-PD-1 therapy | p-value | BRAF/MEK-inhibition therapy       | Anti-PD-1 therapy | p-value |
| <b>N</b>                                          | 114                         | 532               | <0.01   | 112                               | 112               | 1.00    |
| <b>Melanoma type (%)</b>                          |                             |                   |         |                                   |                   |         |
| Superficial spreading                             | 77 (68.1)                   | 342 (64.3)        | 0.60    | 76 (67.9)                         | 68 (60.7)         | 0.40    |
| Nodular                                           | 25 (22.1)                   | 111 (20.9)        |         | 24 (21.4)                         | 27 (24.1)         |         |
| Acral lentiginous                                 | 0 (0.0)                     | 6 (1.1)           |         | 0 (0.0)                           | 2 (1.8)           |         |
| Other                                             | 0 (0.0)                     | 4 (0.8)           |         | 0 (0.0)                           | 0 (0.0)           |         |
| Unknown                                           | 12 (9.7)                    | 69 (13.0)         |         | 12 (10.7)                         | 15 (13.4)         |         |
| <b>Melanoma location (%)</b>                      |                             |                   | 0.84    |                                   |                   | 0.50    |
| Head/Neck                                         | 12 (10.5)                   | 66 (12.4)         |         | 11 (9.8)                          | 11 (9.8)          |         |
| Trunk                                             | 61 (53.5)                   | 284 (53.4)        |         | 61 (54.5)                         | 69 (61.6)         |         |
| Extremity/Acral                                   | 41 (36.0)                   | 182 (34.2)        |         | 40 (35.7)                         | 32 (28.6)         |         |
| <b>Breslow thickness (in mm) (median [range])</b> | 2.3 [0.3, 27.0]             | 2.5 [0.1, 32.0]   | 0.43    | 2.3 [0.3, 16.3]                   | 2.5 [0.4, 32.0]   | 0.95    |
| <b>Ulceration (%)</b>                             |                             |                   | 0.46    |                                   |                   | 0.16    |
| No                                                | 61 (53.5)                   | 312 (58.6)        |         | 60 (53.6)                         | 73 (65.2)         |         |
| Yes                                               | 39 (34.2)                   | 172 (32.3)        |         | 14 (12.5)                         | 8 (7.1)           |         |
| Unknown                                           | 14 (12.3)                   | 48 (9.0)          |         | 38 (33.9)                         | 31 (27.7)         |         |
| <b>BRAF mutation (%)</b>                          |                             |                   | 0.48    |                                   |                   | 0.51    |
| V600E                                             | 89 (78.1)                   | 386 (72.6)        |         | 87 (77.7)                         | 80 (71.4)         |         |
| V600K                                             | 11 (9.6)                    | 50 (9.4)          |         | 11 (9.8)                          | 13 (11.6)         |         |
| V600R                                             | 1 (0.9)                     | 13 (2.4)          |         | 1 (0.9)                           | 1 (0.9)           |         |
| Other BRAF mutation                               | 8 (7.0)                     | 54 (10.2)         |         | 8 (7.1)                           | 13 (11.6)         |         |
| Unknown BRAF mutation                             | 5 (4.4)                     | 29 (5.5)          |         | 5 (4.5)                           | 5 (4.5)           |         |
| <b>In-transit melanoma (%)</b>                    |                             |                   | 0.12    |                                   |                   | 0.94    |
| No satellite/ITM                                  | 81 (71.1)                   | 385 (72.4)        |         | 80 (71.4)                         | 79 (70.5)         |         |
| ITM only                                          | 11 (9.6)                    | 76 (14.3)         |         | 10 (8.9)                          | 11 (9.8)          |         |
| ITM with nodal involvement                        | 20 (17.5)                   | 69 (13.0)         |         | 20 (17.9)                         | 21 (18.8)         |         |
| Unknown                                           | 2 (1.8)                     | 2 (0.4)           |         | 2 (1.8)                           | 1 (0.9)           |         |
| <b>LDH (%)</b>                                    |                             |                   | <0.01   |                                   |                   | 0.09    |
| Normal                                            | 96 (84.2)                   | 504 (94.7)        |         | 95 (84.8)                         | 105 (93.8)        |         |
| 250-500                                           | 13 (11.4)                   | 15 (2.8)          |         | 13 (11.6)                         | 5 (4.5)           |         |
| Unknown                                           | 5 (4.4)                     | 13 (2.4)          |         | 4 (3.6)                           | 2 (1.8)           |         |

ITM = In-transit melanoma, LDH = lactate dehydrogenase.

Table S2. Comorbidities and comedication in cutaneous melanoma patients treated with adjuvant BRAF/MEK-inhibition therapy and adjuvant anti-PD-1-treated patients.

|                                               | Adjuvant BRAF/MEK- treated patients | Adjuvant anti-PD-1 | p-value |
|-----------------------------------------------|-------------------------------------|--------------------|---------|
| <b>n</b>                                      | 114                                 | 532                |         |
| <b>Autoimmune Disease (%)</b>                 | 23 (20.2)                           | 18 (3.4)           | <0.01   |
| Rheumatoid comorbidities /SLE/scleroderma (%) | 12 (10.5)                           | 9 (1.7)            | <0.01   |
| Morbus Graves (%)                             | 1 (0.9)                             | 0 (0.0)            | 0.40    |
| IBD (%)                                       | 6 (5.3)                             | 1 (0.2)            | <0.01   |
| Other autoimmune comorbidities (%)            | 3 (2.6)                             | 4 (0.8)            | 0.21    |
| <b>Cardiovascular (%)</b>                     | 19 (16.7)                           | 65 (12.2)          | 0.26    |
| <b>Vascular (%)</b>                           | 27 (23.7)                           | 119 (22.4)         | 0.86    |
| <b>Diabetes Mellitus (%)</b>                  | 11 (9.6)                            | 47 (8.8)           | 0.92    |
| <b>Pulmonary (%)</b>                          | 10 (8.8)                            | 41 (7.7)           | 0.84    |

|                              |           |            |       |
|------------------------------|-----------|------------|-------|
| Neurological/Psychiatric (%) | 14 (12.3) | 63 (11.8)  | 1.00  |
| Digestive tract (%)          | 13 (11.4) | 32 (6.0)   | 0.07  |
| Urogenital (%)               | 15 (13.2) | 44 (8.3)   | 0.14  |
| Thromboembolic (%)           | 5 (4.4)   | 7 (1.3)    | 0.07  |
| Musculoskeletal (%)          | 22 (19.3) | 46 (8.6)   | <0.01 |
| Endocrine (%)                | 6 (5.3)   | 34 (6.4)   | 0.81  |
| Infectious disease (%)       | 5 (4.4)   | 7 (1.3)    | 0.07  |
| Previous malignancy (%)      | 13 (11.4) | 71 (13.3)  | 0.69  |
| Transplant (%)               | 3 (2.6)   | 0 (0.0)    | <0.01 |
| Other comorbidities (%)      | 33 (28.9) | 113 (21.2) | 0.09  |
| Comedication (%)             | 76 (66.7) | 288 (54.1) | 0.02  |

SLE= Systemic Lupus Erythematosus, IBD: Inflammable Bowel Disease.

**Table S3.** Patient characteristics of unmatched patients after nearest neighbor matching.

|                      |        | Adjuvant<br>BRAF/MEK-<br>treated patients | Adjuvant anti-<br>PD-1 | p-value | SMD   |
|----------------------|--------|-------------------------------------------|------------------------|---------|-------|
|                      |        | 2                                         | 420                    |         |       |
| <b>Age</b>           | <65    | 0 (0.0)                                   | 270 (64.3)             | 0.250   | 1.897 |
|                      | >65    | 2 (100.0)                                 | 150 (35.7)             |         |       |
| <b>Sex</b>           | 1      | 0 (0.0)                                   | 250 (59.5)             | 0.323   | 1.715 |
|                      | 2      | 2 (100.0)                                 | 170 (40.5)             |         |       |
| <b>ECOG PS</b>       | 0      | 2 (100.0)                                 | 318 (75.7)             | 1.000   | 0.801 |
|                      | ≥1     | 0 (0.0)                                   | 102 (24.3)             |         |       |
| <b>Comorbidities</b> | No     | 2 (100.0)                                 | 168 (40.0)             | 0.316   | 1.732 |
|                      | Yes    | 0 (0.0)                                   | 252 (60.0)             |         |       |
| <b>AJCC8 Stage</b>   | IIIA   | 0 (0.0)                                   | 36 (8.6)               | 0.440   | 1.649 |
|                      | IIIB   | 0 (0.0)                                   | 169 (40.2)             |         |       |
|                      | IIIC/D | 2 (100.0)                                 | 178 (42.4)             |         |       |
| Unknown              |        | 0 (0.0)                                   | 37 (8.8)               |         |       |

**Table S4.** Patient characteristics after optimal matching.

|                      |        | BRAF/MEK-inhi-<br>bition therapy | Anti-PD-1 ther-<br>apy | p-value | SMD    |
|----------------------|--------|----------------------------------|------------------------|---------|--------|
|                      |        | 114                              | 114                    |         |        |
| <b>Age</b>           | <65    | 76 (66.7)                        | 71 (62.3)              | 0.580   | 0.092  |
|                      | >65    | 38 (33.3)                        | 43 (37.7)              |         |        |
| <b>Sex</b>           | 1      | 63 (55.3)                        | 65 (57.0)              | 0.894   | 0.035  |
|                      | 2      | 51 (44.7)                        | 49 (43.0)              |         |        |
| <b>ECOG PS</b>       | 0      | 82 (71.9)                        | 82 (71.9)              | 1.000   | <0.001 |
|                      | ≥1     | 32 (28.1)                        | 32 (28.1)              |         |        |
| <b>Comorbidities</b> | No     | 29 (25.4)                        | 27 (23.7)              | 0.878   | 0.041  |
|                      | Yes    | 85 (74.6)                        | 87 (76.3)              |         |        |
| <b>AJCC8 Stage</b>   | IIIA   | 18 (15.8)                        | 19 (16.7)              | 0.998   | 0.025  |
|                      | IIIB   | 31 (27.2)                        | 31 (27.2)              |         |        |
|                      | IIIC/D | 51 (44.7)                        | 50 (43.9)              |         |        |
| Unknown              |        | 14 (12.3)                        | 14 (12.3)              |         |        |

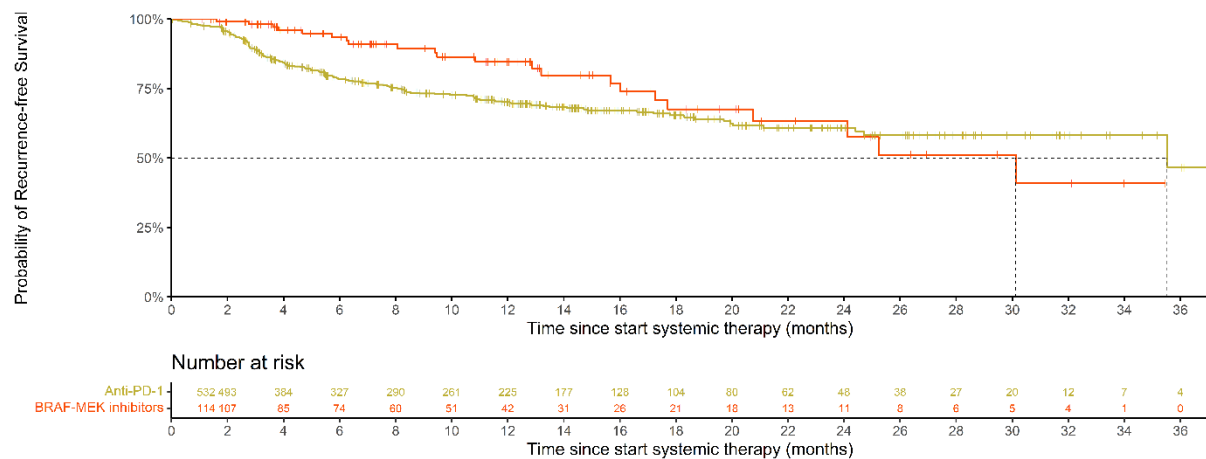

Figure S1: Recurrence-free survival (RFS) of BRAF/MEK- and anti-PD-1-treated patients before propensity score matching in the original cohort.

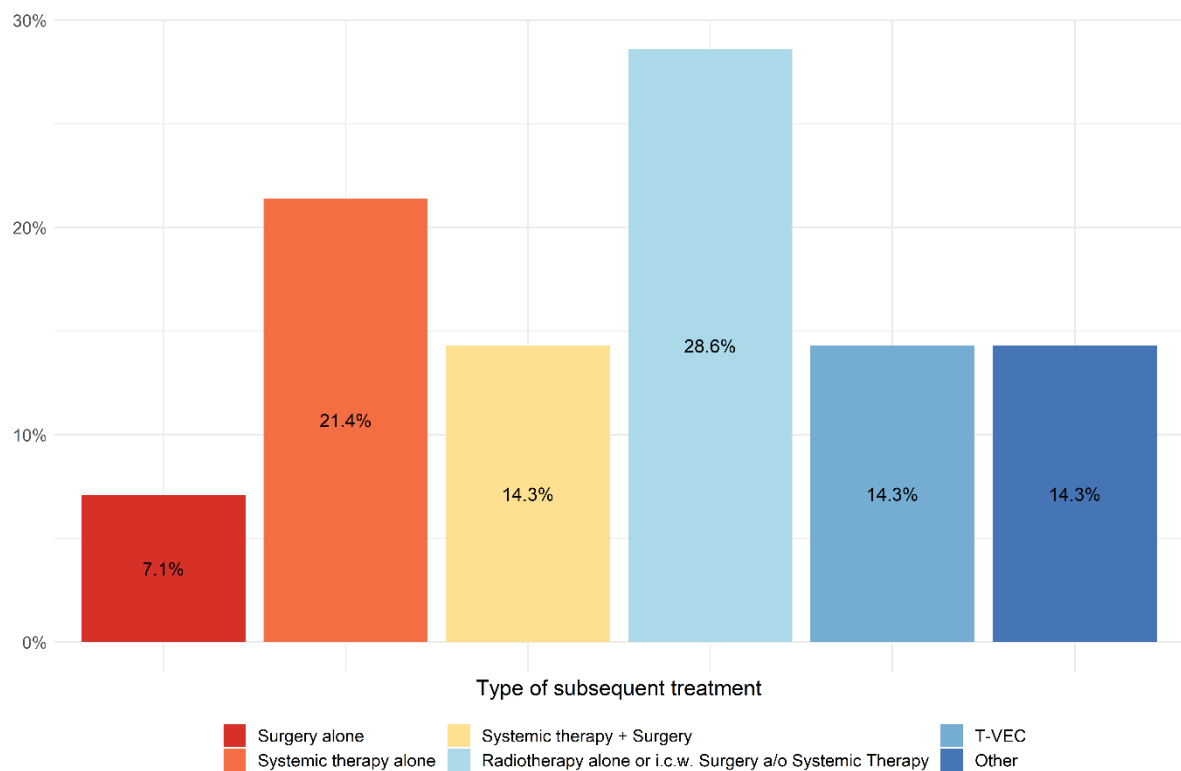

Figure S2: Type of subsequent treatment in patients in BRAF/MEK-treated patients who had a subsequent treatment registered into the DMTR database. (n=14)

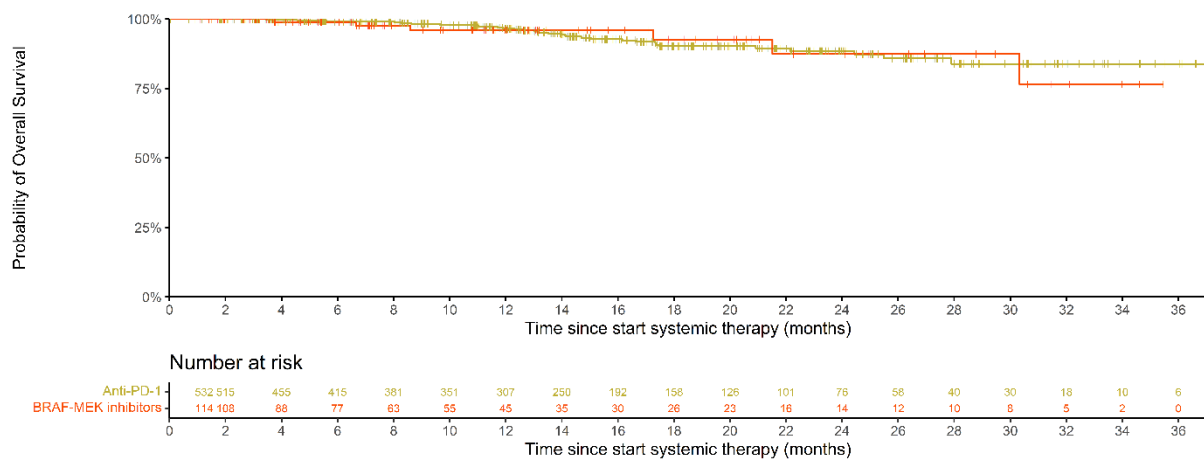

Figure S3: Overall survival (OS) of BRAF/MEK- and anti-PD-1-treated patients before propensity score matching in the original cohort.

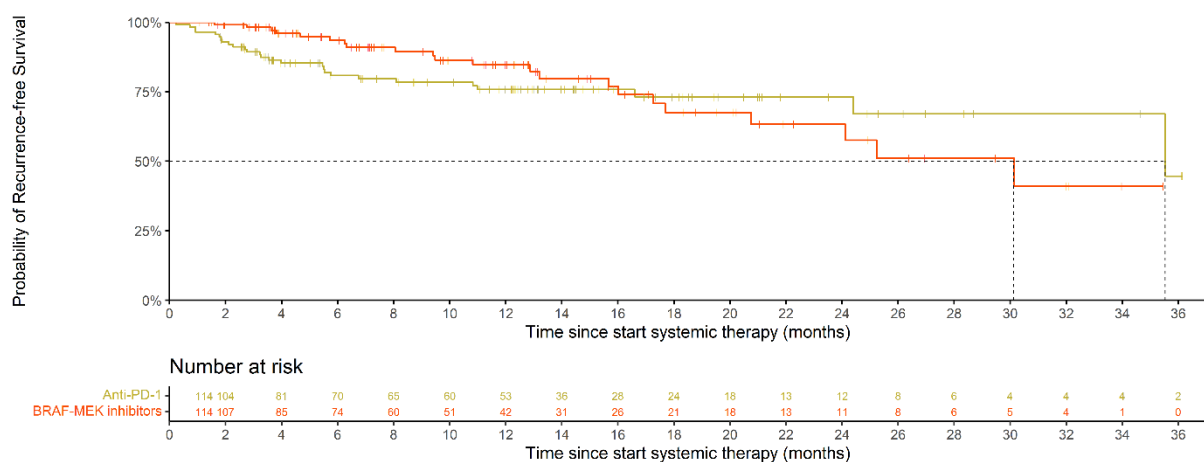

Figure S4: Recurrence-free survival (RFS) of BRAF/MEK- and anti-PD-1-treated patients after optimal matching.

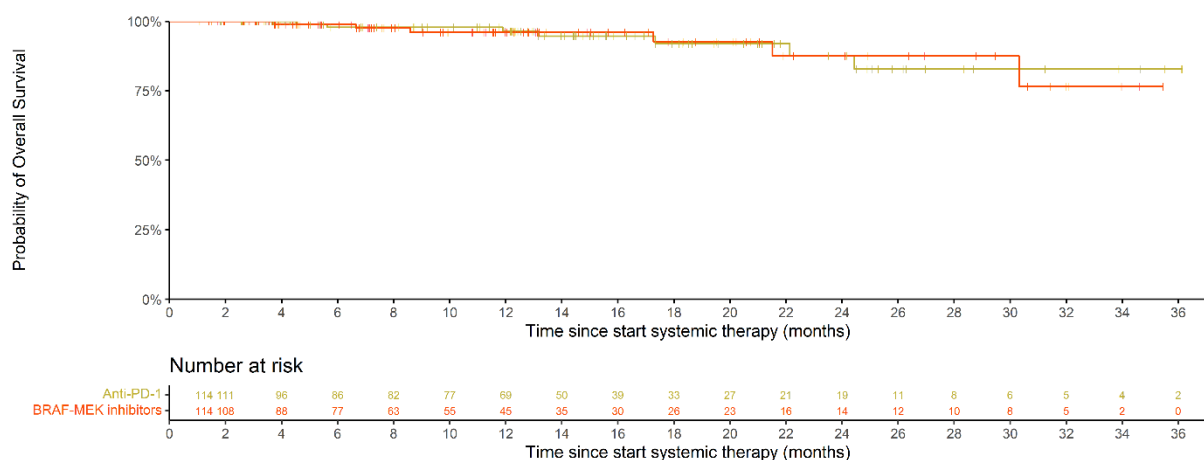

Figure S5: Overall survival (OS) of BRAF/MEK- and anti-PD-1-treated patients after optimal matching.
